# Supplementary material for: Dynamic metabolic exchange governs a marine algal-bacterial interaction
Source: eLife. 2016 Nov 18;5:e17473. doi: 10.7554/eLife.17473 (PMC5148602; doi:10.7554/eLife.17473)
Supplement: Supplementary file 3. — DOI: http://dx.doi.org/10.7554/eLife.17473.021 [file elife-17473-supp3.xlsx]

## Sheet: Sheet1
Functional group	Gene annotation	Target transcript	Alg day 3			Co day 3			Alg day 10			Co day 10			Alg day 17			Co day 17				Ratios
			Average	StDev	StDev %	Average	StDev	StDev %	Average	StDev	StDev %	Average	StDev	StDev %	Average	StDev	StDev %	Average	StDev	StDev %		Day 3 Co/Alg	Day 10 Co/Alg	Day 17 Co/Alg
Calcification	H+/Ca2+ exchanger (CAX3)	XM_005761181	586.63	3.37997	0.576167	507.337	26.5024	5.22382	3515.61	224.45	6.38438	5896.42	500.427	8.48696	4182.59	399.869	9.56032	8303.89	424	5.10604		0.864833	1.67721	1.98535
Calcification	carbonic anhydrase (CA1)	XM_005764152	104.98	28.751	27.3871	118.954	22.1112	18.5881	1507.51	3.74059	0.248132	3288.42	569.985	17.3331	2593.59	140.785	5.42819	6721.43	474.313	7.05673		1.13311	2.18137	2.59155
Calcification	HCO3 transporter (SLC4-2)	XM_005766544	34.99	11.3986	32.5766	38.2005	7.00743	18.3438	643.54	21.7506	3.37984	1478.12	183.112	12.3882	1136.41	27.8459	2.45034	2969.11	63.3285	2.13291		1.09175	2.29686	2.61271
Calcification	gamma carbonic anhydrase (Gamma_CA_1)	XM_005766918	25.135	8.49235	33.787	33.6748	7.09228	21.0611	466.53	64.7568	13.8805	1187.73	217.697	18.3289	766.43	27.2943	3.56123	2152.63	486.687	22.6089		1.33976	2.54587	2.80865
Calcification	calmodulin (CAM1)	XM_005782317	240.455	20.3293	8.45452	209.93	30.5894	14.5713	1970.59	194.044	9.84701	2864.85	131.289	4.58274	2060.01	196.519	9.53972	3940.84	1756.38	44.5687		0.873053	1.4538	1.91302
Calcification	alpha-type carbonic anhydrase	XM_005784940	18.545	5.05581	27.2624	15.4346	2.22032	14.3853	366.7	4.87904	1.33053	350.235	42.0234	11.9986	331.635	57.4241	17.3155	1154.93	546.94	47.3571		0.832278	0.9551	3.48253
Calcification	HCO3 transporter (SLC4-1)	XM_005788352	205.43	37.7171	18.3601	191.853	11.6248	6.05925	2267.12	102.332	4.51377	4856.91	388.11	7.99088	3657.64	221.727	6.06204	7806.26	2064.14	26.4422		0.933908	2.14233	2.13424
Calcification	polysacharide-associated, calcium-binding protein (GPA)	XM_005794201	175.19	24.3669	13.9088	214.567	25.6114	11.9363	3010.26	276.366	9.18079	7211.42	1216.62	16.8707	4607.68	266.204	5.7774	9906.25	1046.95	10.5686		1.22477	2.39561	2.14994
Cell division	cell division cycle protein 48	XM_005756305	765.06	0.424264	0.055455	683.992	13.3502	1.9518	2730.41	229.046	8.3887	1691.55	179.018	10.5831	1906.78	312.011	16.3633	948.531	123	12.9674		0.894037	0.619522	0.497453
Cell division	cell division cycle protein 48	XM_005765434	850.33	41.592	4.89128	709.849	25.5973	3.60602	2136.18	108.803	5.09333	3894.37	449.168	11.5338	3039.48	127.124	4.18241	4911.6	515	10.4854		0.834792	1.82306	1.61593
Cell division	putative cell division cycle protein 23, CDC23	XM_005781497	64.12	8.47114	13.2114	59.8764	2.05061	3.42474	885.74	30.4056	3.43279	1735.4	148.471	8.55542	1357.08	57.6999	4.25177	2825.32	184	6.51253		0.933818	1.95927	2.08191
DMSP	putative dddD enzyme (dddD2)	XM_005764661	47.83	19.2616	40.2709	50.6165	5.09824	10.0723	803.61	146.555	18.2371	2010.93	212.443	10.5644	1214.03	38.5444	3.17493	3617.36	11.5117	0.318235		1.05826	2.50237	2.97964
Growth rate	putative histone H3	XM_005756339	2737.88	107.12	3.91251	2955.42	53.0047	1.79348	31083.1	936.45	3.01273	33072.4	2828.36	8.552	29729.1	1542.63	5.18895	52372.6	18817.8	35.9307		1.07946	1.064	1.76166
Growth rate	30S ribosomal protein S2	XM_005770563	171.64	17.1403	9.98617	197.532	27.8954	14.122	2410.7	55.6634	2.30902	4671.23	472.475	10.1146	3525.93	80.2213	2.27518	9347.89	1186	12.6874		1.15085	1.93771	2.65119
Growth rate	30S ribosomal protein S9	XM_005770657	56.335	14.3755	25.5179	48.3803	7.74282	16.0041	443.62	25.7104	5.79559	1024.31	39.3151	3.8382	696.08	19.1767	2.75496	1383.12	111	8.02534		0.858797	2.30899	1.98701
Growth rate	putative histone H4	XM_005775327	257.22	49.1863	19.1223	309.88	41.7547	13.4745	4275.1	8.16001	0.190873	8578.66	1006.84	11.7366	6238.19	25.0316	0.401264	12318.7	919	7.46022		1.20473	2.00666	1.97472
Growth rate	putative histone H2A	XM_005775328	100.425	19.3677	19.2857	118.377	10.1116	8.54189	1845.74	98.7899	5.3523	3245.06	369.781	11.3952	2265.4	142.15	6.2748	5329.13	2223.26	41.7191		1.17876	1.75813	2.3524
Growth rate	putative histone H4	XM_005775391	1675.95	11.3208	0.675482	2075.98	130.878	6.3044	20415.6	952.162	4.66389	26939.4	2519.8	9.3536	22625.7	364.528	1.61112	44117.1	16068.3	36.4219		1.23869	1.31955	1.94987
Lipid metabolism	Sulfolipid biosynthesis protein (SQD1)	XM_005756786	702.715	23.285	3.31358	556.012	13.6189	2.44938	1891.24	12.1269	0.641215	2701.92	165.597	6.12887	2244.89	60.3657	2.68902	4475.44	761.837	17.0226		0.791234	1.42865	1.99361
Lipid metabolism	phospholipase D	XM_005769120	16.64	1.62635	9.77371	32.4382	9.89949	30.518	412.395	0.176777	0.0428659	827.879	84.3437	10.1879	657.19	55.9604	8.51511	1310.14	205.563	15.6901		1.94941	2.00749	1.99356
Lipid metabolism	triacylglycerol lipase 1 (LIP1)	XM_005780464	110.83	36.2887	32.7427	120.655	26.3256	21.8189	1981.47	11.2501	0.567762	4102.17	555.072	13.5312	3225.24	47.5741	1.47506	7103.45	386	5.43398		1.08865	2.07026	2.20246
Lipid metabolism	putative lipid phosphate phosphatase (PAP2)	XM_005793926	88.605	33.5381	37.8512	97.0932	16.0725	16.5537	1703.74	31.537	1.85104	3513.33	523.089	14.8887	2600.36	39.6333	1.52415	6304.67	1967.31	31.204		1.0958	2.06213	2.42453
Lipid saturation	sterol desaturase	XM_005757513	121.45	24.8477	20.4592	165.541	30.6672	18.5254	1927.99	168.645	8.74719	4291.74	319.287	7.43957	2992.09	302.288	10.1029	5476.19	1086.15	19.8341		1.36304	2.22602	1.83022
Lipid saturation	delta-12 fatty acid desaturase (FADS1)	XM_005759423	2163.53	145.523	6.72616	1860.37	142.609	7.66564	11742.2	1335.35	11.3723	12232.6	633.801	5.18126	9980.86	1930.92	19.3463	11854.6	1035	8.73079		0.859878	1.04176	1.18773
Lipid saturation	putative Dihydroceramide desaturase (DEGS2)	XM_005762500	167.1	52.637	31.5003	185.542	27.4782	14.8097	3039.2	26.9196	0.885743	6722.19	1060.94	15.7827	4724.08	169.076	3.57904	10683.1	4456.41	41.7147		1.11037	2.21183	2.26141
Lipid saturation	dihydroceramide delta(4)-desaturase (DCDS)	XM_005765423	452.375	53.832	11.8999	472.944	12.5158	2.64636	4174.8	33.8633	0.811138	6303.7	171.714	2.72401	4972.23	676.051	13.5965	10146.9	2523.66	24.8711		1.04547	1.50994	2.04072
Lipid saturation	putative fatty acid desaturase	XM_005770546	153.64	44.6326	29.0501	179.457	40.3263	22.4713	2689.97	96.3504	3.58184	5836.38	895.876	15.3499	4038.88	121.127	2.99903	11034.5	724.608	6.56675		1.16803	2.16968	2.73207
Lipid saturation	fatty acid desaturase (OLE1)	XM_005779417	94.045	24.3174	25.8572	118.182	18.2716	15.4606	1649.13	144.419	8.75731	3214.81	496.24	15.4361	2527.47	88.6217	3.50635	5307.84	237.5	4.47451		1.25665	1.9494	2.10006
Lipid saturation	Phytoene desaturase (PDS3)	XM_005784113	165.37	17.8332	10.7838	151.953	19.0353	12.5271	1544.61	205.118	13.2796	2796.48	183.607	6.56566	2324.85	158.745	6.8282	4942.14	1150.11	23.2715		0.918867	1.81048	2.12579
Metacaspases	putative metacaspase protein	XM_005759676	239.875	41.5708	17.3302	280.207	30.4197	10.8561	2823.39	105.005	3.71912	5374.41	843.508	15.6949	3778.74	55.2321	1.46165	11565	3743.67	32.3708		1.16814	1.90353	3.06053
Metacaspases	putative metacaspase protein	XM_005763016	214.04	33.7149	15.7517	225.665	37.5969	16.6605	2734.24	48.6277	1.77847	6351.39	906.645	14.2748	4108.36	244.567	5.9529	18033.3	226.373	1.2553		1.05431	2.3229	4.38942
Metacaspases	putative metacaspase protein	XM_005773908	108.55	37.4767	34.5248	158.188	24.2538	15.3322	1901.76	27.0186	1.42071	4338.67	491.213	11.3217	3057.35	97.0292	3.17364	11721.3	1098.29	9.36997		1.45728	2.28139	3.83382
Metacaspases	putative metacaspase protein with Ca-binding EF hand domain	XM_005784588	189.88	19.403	10.2186	248.495	44.0528	17.7278	3259.78	478.252	14.6713	10742.1	1538.74	14.3243	6493.92	1237.56	19.0573	29475.9	5590.8	18.9674		1.3087	3.29534	4.539
Metacaspases	putative metacaspase protein	XM_005791576	16.68	4.62448	27.7247	33.2481	4.06586	12.2289	423.93	39.3576	9.28398	1121.31	135.496	12.0837	734.825	104.164	14.1753	2960.48	18.4131	0.621961		1.99329	2.64503	4.02883
Oxidative stress	glutathione synthetase (GSHS3)	XM_005760150	112.905	26.7216	23.6673	149.043	20.7394	13.9151	1863.82	199.835	10.7218	3983.38	425.304	10.6769	3074.55	337.792	10.9867	10947.9	676.574	6.17994		1.32007	2.13722	3.56081
Oxidative stress	putative glutathione-S-transferase	XM_005761417	86.455	25.3498	29.3214	113.528	13.138	11.5725	1327.64	4.91439	0.370159	2916.59	317.081	10.8716	2116.34	71.1137	3.36023	8621.49	876.713	10.1689		1.31315	2.19681	4.07378
Oxidative stress	thioredoxin	XM_005761968	70.045	8.76105	12.5077	71.9538	15.4644	21.4922	1004.51	115.223	11.4705	2017.32	222.23	11.0161	1406.01	157.466	11.1995	3868.83	169	4.36824		1.02725	2.00826	2.75165
Oxidative stress	ascorbate oxidase (AO)	XM_005775302	95.515	34.4856	36.1049	161.716	31.4168	19.4271	1667.32	142.631	8.5545	4703.25	903.774	19.2159	2792.64	10.5712	0.37854	11414.9	270.079	2.36603		1.6931	2.82085	4.0875
Oxidative stress	putative L-ascorbate peroxidase	XM_005793355	29.96	5.75585	19.2118	40.6757	5.26795	12.9511	461.89	11.738	2.54129	1473.61	346.093	23.4861	856.895	90.5733	10.5699	5834.46	1141.4	19.5632		1.35767	3.19039	6.80884
Photosynthesis	light harvesting protein (Lhcf25_2)	XM_005782228	3978.66	250.054	6.28488	3376.03	8.36507	0.247779	15304.1	1384.08	9.04386	17226.4	1085.25	6.29989	13591.3	3881.08	28.5556	10873	1421	13.069		0.848532	1.12561	0.8
Photosynthesis	light harvesting protein (Lhcf36_2)	XM_005792913	124.085	17.5433	14.1381	136.58	20.096	14.7137	1477.49	9.66615	0.654226	2941.28	263.602	8.96218	2120.73	96.1736	4.53492	2969.03	474.348	15.9766		1.1007	1.99072	1.4
Programmed cell death	putative programmed cell death protein	XM_005768970	94.78	20.2091	21.3221	124.525	21.588	17.3363	1685.95	105.104	6.23413	3594.1	443.2	12.3313	2534.78	2.2486	0.0887099	13418.2	999.976	7.45239		1.31383	2.1318	5.29363
Programmed cell death	putative death-specific protein with Ca binding EF hand domain	XM_005773034	75.98	22.3021	29.3527	107.023	24.8831	23.2502	1461.87	101.802	6.96386	2920.86	364.478	12.4784	2128.14	160.103	7.52315	6844.55	1869.05	27.3072		1.40857	1.99804	3.21621
Programmed cell death	putative death-specific protein with Ca binding EF hand domain	XM_005778875	68.555	22.0971	32.2326	101.168	16.8716	16.6768	1464.01	150.692	10.2931	3519.46	411.437	11.6904	2283.8	206.73	9.05201	8862.5	87.5681	0.988075		1.47572	2.40399	3.88059
Programmed cell death	putative programmed cell death protein	XM_005790372	118.2	20.2515	17.1333	143.176	12.0491	8.4156	1886.61	104.305	5.52873	4002.94	520.593	13.0053	2830.19	188.996	6.67784	10880.3	1203.01	11.0567		1.2113	2.12177	3.84438
Vesicles	vesicle-associated membrane protein 7 (VAMP7-6)	XM_005756341	111.905	24.572	21.9579	101.206	18.7383	18.515	985.935	15.2947	1.55129	1854.58	323.105	17.422	1448.07	25.6821	1.77354	3572.84	269.846	7.5527		0.904394	1.88104	2.46731
Vesicles	vesicle transport through interaction with t-snares (VTI1-4)	XM_005756368	104.87	14.623	13.9439	109.631	1.0748	0.980385	1441.53	67.2529	4.66537	3268.97	400.831	12.2617	2257.97	229.845	10.1793	5985.52	236.223	3.94657		1.0454	2.2677	2.65085
Vesicles	vesicle-associated membrane protein 7 (VAMP7-5)	XM_005757629	157.73	27.6196	17.5107	174.877	25.569	14.6211	1907.02	110.733	5.80659	3932.86	484.969	12.3312	3033.09	203.64	6.71395	7037.96	1494.94	21.2411		1.10871	2.06231	2.3204
Vesicles	vesicle-trafficking protein SEC22b	XM_005766477	145.37	16.023	11.0222	151.715	6.2084	4.09213	1495.76	27.7964	1.85834	2720.56	377.517	13.8765	2179.27	138.699	6.36446	5193.11	1523.11	29.3294		1.04365	1.81884	2.38295
Vesicles	vesicle transport protein Sec20 (SEC20)	XM_005776113	86.12	7.96202	9.24527	113.463	15.125	13.3304	1509.14	17.1827	1.13858	3092.49	448.779	14.5119	2569.93	207.988	8.09315	5529.38	244.8	4.42726		1.31749	2.04918	2.15157
